# Manipulation of Seedling Traits with Pulsed Light in Closed Controlled Environments

Shiwei Song<sup>1,2</sup>, Paul Kusuma<sup>1</sup>, Sofia D. Carvalho<sup>1†</sup>, Yan Li<sup>1,3</sup> and Kevin M. Folta<sup>1,4\*</sup>

<sup>1</sup> Horticultural Sciences Department, University of Florida, Gainesville, FL USA

<sup>2</sup> College of Horticulture, South China Agricultural University, Guangzhou, China

<sup>3</sup> College of Horticultural Science and Engineering, Shandong Agricultural University, Tai'an, Shandong, China

<sup>4</sup> Graduate Program in Plant Molecular and Cellular Biology, University of Florida, Gainesville, FL USA

\* Corresponding author: Phone: 352.273.4350, email address: [kfolta@ufl.edu](mailto:kfolta@ufl.edu)

† Current address: Colegio de Ciencias Biológicas y Ambientales, Universidad San Francisco de Quito, Quito Ecuador

Keywords: microgreens, sprouts, kale, beet, LED, photomorphogenesis

1 **Abstract**

2 There is substantial interest in growing crops in closed controlled environments, yet the energy  
3 requirements are high. Energy is required to produce light, but also to remove the heat generated  
4 when producing light. The goal of the current work examines a possible approach to decrease the  
5 energy requirement. The effect of pulsed light treatments was examined by monitoring seedling  
6 traits during early photomorphogenic development. Daily light integral remained unchanged  
7 between treatments, but the frequency of the pulses was varied. Developmental traits (such as  
8 inhibition of hypocotyl elongation rate) were most conspicuous during a normal photoperiod, as in  
9 twelve hours light, twelve hours darkness. Consistent with historical reports, when treatments were  
10 delivered in shorter durations (e.g. 1 hour on/off) photomorphogenic development was hindered,  
11 with the same daily light integral. However, at even shorter light intervals (e.g. seconds) seedlings  
12 developed as if they were provided full 12 h treatments. Extension of the dark period following a 5 s  
13 pulse was tested to determine the effect on seedling traits. The results showed that the dark period  
14 could be extended to at least 10 s without affecting seedling development, and extension to 20 s  
15 only had slight effects on seedling traits. The mechanism of the phenomenon was examined in  
16 Arabidopsis photosensory mutants, with substantial contributions from the phyA and cry1 pathways.  
17 The results suggest that pulsed light with extended dark periods can decrease energy input by at  
18 least 30% to >50% without affecting visible seedling traits. These pilot experiments in seedlings  
19 demonstrate that implementation of short-interval, pulsed-light strategies may lower energy  
20 requirements for growing crops in artificially illuminated environments.

21

## 22 **Introduction**

23 Emerging trends in indoor farming offer alternatives to standard greenhouse or field  
24 production. Crops raised inside closed controlled environments (CCE) offer the advantage of  
25 production of high-value specialty crops in or near population centers, a low carbon footprint  
26 relative to crops shipped over distance, the use of different crop protection strategies, and  
27 opportunities to conserve water and fertilizer [1, 2]. These approaches provide profitable non-  
28 traditional production of high-value specialty crops.

29 However, there are challenges to growing plants in CCE, including costs of initial investment  
30 and energy use. Depending on local economic situations, energy alone represents between 25% [3]  
31 and 60% [4] of production costs, and they have a greater carbon footprint than traditional  
32 greenhouses [5]. These realities present bottlenecks to profitable production, as energy is needed  
33 for lighting as well as to dissipate the heat energy generated from light sources [reviewed in 6].

34 Light is required for plant growth via photosynthesis, but it also has an important role in  
35 shaping plant physiology, development, metabolism and morphology during the developmental  
36 program called photomorphogenesis [reviewed in 7, 8]. Because plants are rooted in one place,  
37 plants must continually monitor the ambient environment and adjust gene expression patterns to  
38 best acclimate to prevailing conditions [9, 10]. The light environment is monitored through a series  
39 of specialized light sensors, each with an optimal range of activation, and each with downstream  
40 signaling pathways that terminate in mechanisms that shape plant biology. Over the last decade  
41 many reports have examined the effect of narrow-bandwidth spectrum, photoperiod and fluence  
42 rate with the intent of manipulating plant traits in controlled environments [11]. However, while  
43 control of light quantity and quality has become exquisite, the energy needs to drive plant  
44 production remain high.

45 Clearly light quantity (fluence rate), quality (wavelength), duration (photoperiod) can be  
46 altered individually or in combination to influence plant traits using today's sophisticated  
47 technologies. In this report we revisit another variable—the frequency of pulses applied in intervals

48 of seconds to hours. While mostly confined to studies of intermittent pulse rate and photosynthesis  
49 [12, 13] , other historical reports noted that varying treatments from seconds to minutes to hours  
50 can have profound effects on plant growth and development, with seconds-long pulses being visibly  
51 indistinguishable from a normal 12 hour dark-light photoperiod [14].

52 Because plants grow well in seconds-long pulses, it becomes possible to explore energy  
53 savings by extending the dark period between pulses. The hypothesis is that a defined frequency of  
54 pulses may lead to production of identical plant products with fewer photons invested. These  
55 experiments exploit two factors not available to Garner and Allard in 1931-- the known plasticity of  
56 highly-responsive seedlings, photomorphogenic mutants, and narrow-bandwidth light sources. Here  
57 these three tools have been combined to examine the effects of light pulses on growth and  
58 development, with special attention to the length of the dark period between pulses. Consistent  
59 with eighty-eight-year-old observations using full-spectrum white light [14], the results indicate that  
60 seedlings treated with pulse light for several seconds are indistinguishable from those treated with a  
61 normal photoperiod. Examination of the dark interval shows that it may be extended without  
62 affecting seedling development for well past the equivalent seconds-long treatment to obtain the  
63 same effect from one 12 h light treatment. The use of pulsed light with extended dark periods  
64 provides an additional tool to manipulate plant growth and development, and may provide energy  
65 savings by supporting comparable growth with significantly lower daily light integrals.

66

## 67 **Materials and Methods**

### 68 **Plant Materials**

69 Red Russian Kale, Purple Top Turnip, and Ruby Queen Beet Seeds were purchased from Johnny's  
70 Selected Seeds (Fairfield, ME). Arabidopsis experiments were performed with seedlings in the  
71 Columbia (Col-0) background. Experiments for cryptochrome (*cry1-304* and *cry2-1*) mutants were  
72 performed in the Col-0 background. Phytochrome mutants (*phyA-201* and *phyB-5*) were tested in  
73 the Landsberg *erecta* (Ler) background.

74

### 75 **Growth and assay conditions**

76 Survey experiments were performed on seeds placed on autoclaved BioStrate Felt saturated  
77 with 0.1x Hoaglands basal salt hydroponic solution inside glass, wide-mouth, pint canning jars  
78 covered with the lower half of a plastic petri dish. The seeds were stratified in darkness at 4°C for 72  
79 h, and then transferred to room temperature (22°C ±2°) and exposed to cool white fluorescent light  
80 (15 μmol m<sup>-2</sup> s<sup>-1</sup>) for 1 h, and then moved into complete darkness for a minimum of 2 h before being  
81 transferred to the specific light treatment.

82 Pulse-light experiments were performed on seedlings on an agar substrate in plastic  
83 Magenta boxes. Twenty-five Red Russian Kale (*Brassica napus*), Purple Top Turnip (*Brassica rapa*,  
84 Mountain Valley Seed Co.), or Ruby Queen beet (*Beta vulgaris*, Eden Brothers) seeds were surface  
85 sterilized with a rinse in 70% ethanol in a laminar flow hood, and then placed in a grid pattern on ½  
86 x MS medium (pH5.8) solidified with 0.75%-0.80% phytoagar. Seeds were then stratified for 72 h,  
87 given a 1 h white light treatment (15 μmol m<sup>-2</sup> s<sup>-1</sup>) to synchronize germination, and then were moved  
88 to specific light conditions. Arabidopsis experiments were performed in identical conditions except  
89 that seedlings were grown on square Petri dishes oriented vertically, allowing seedlings to grow up  
90 the surface of the plates for ease of imaging.

91 Narrow-bandwidth LED light treatments were provided by Plant Whisperer MarkV light units  
92 (Light Emitting Computers, Victoria, BC Canada). Wavelengths tested include 450 nm (blue; B), 660

93 nm (red; R), and 730nm (far-red; FR). For some light pulse experiments both a GRALab model 655  
94 intervalometer and the Apollo 6 Timer (Titan Controls) were used. In later experiments pulse-light  
95 treatments were performed using the custom LED light sources where the DC limb was controlled  
96 using a custom Raspberry Pi based electronic relay array. Trials were conducted in ventilated growth  
97 chambers lined with reflective mylar maintained at 22°C (±2°C). Light treatments varied in  
98 wavelength, pulse duration, total hours of light exposure, and fluence rate as described below.

99         After 96 h of treatment time, fresh weight was measured before the seedlings were  
100 transferred to a flat-bed scanner for image capture for hypocotyl length measurement. The  
101 seedlings were then frozen with liquid nitrogen, and crushed into a powder using a mortar and  
102 pestle. The powder was then placed into a 1.7mL microcentrifuge tube for anthocyanin  
103 measurements. Roughly 100mg was used for each extraction.

104         For anthocyanin measurements 300 µL of methanol-1%HCl was added to each tube, and  
105 then placed in darkness at 4°C for at least 16 h [15]. Next, 200 µL of water and 500 µL of chloroform  
106 were added to the tube, the contents were vortexed and then centrifuged in a microcentrifuge at  
107 the highest speed for 5 min. Roughly 400 µL of the supernatant was moved to a new tube, to which  
108 400 µL of 60% methanol-1%HCl 40% water was added. A SmartSpec 3000 spectrophotometer (Bio-  
109 Rad) was used to measure the absorbance at 530 and 657 nm. 60% methanol-1%HCl 40% water was  
110 used as a blank. Final anthocyanin per mg tissue was calculated using the following equation:

111 Anthocyanin/mg FW tissue =  $((Abs_{530} - Abs_{657}) \times 1000) / \text{powder weight (mg)}$

112

### 113 **Statistical analysis**

114 All experiments were repeated at least three times. Statistical analyses were performed using the  
115 statistical software package SPSS 19.0 (SPSS, Inc., Chicago, IL, USA). Data were analyzed by one-way  
116 analysis of variance with LSD method.

## 117 **Results**

### 118 **Developmental Response to Light Treatment**

119 To examine the effect of different light pulse lengths at a common daily light integral (DLI),  
120 seedlings from three genotypes were placed into chambers and treated with various fluence rates of  
121 far-red light. FR was chosen because it induces strong responses in Red Russian kale and is widely  
122 recognized for its strong effect on inhibition of hypocotyl elongation and anthocyanin accumulation  
123 [16]. At the same time FR light sources do not significantly excite photosynthesis, so using these  
124 wavebands allows uncoupling of developmental response from influences arising from chloroplast  
125 development and photosynthesis. Seedlings were grown for 96 h under pulses of FR light, varying  
126 from 5 s to 12 h, all with a fluence rate  $100 \mu\text{mol m}^{-2} \text{s}^{-1}$  and DLI of  $4.32 \text{ mol m}^{-2}$ . The results are  
127 presented in in Figure 1.

128 The results show that in Red Russian Kale and Purple Top Turnip seedlings accumulate  
129 anthocyanins in a 12 h (on/off) light interval. As the light interval is split into smaller time periods  
130 there is less accumulation as pulse times decrease from 6 h down to 1 min, with the lowest  
131 accumulation occurring between 30 min and 1 h. Light pulses of 30 s and under led to the same  
132 amount of anythocyanin (or possibly more) as a 12 h treatment. The Ruby Queen beet also  
133 exhibited a similar trend, but the absolute levels of anthocyanin were higher than in the other two  
134 seedlings. Further experiments would focus only on kale and the turnip seedlings.

135 A similar trend was observed for hypocotyl elongation (Figure 1). Seedlings grown under  
136 longer intervals that approximate normal day/night intervals exhibited the shortest hypocotyls, with  
137 the longest hypocotyls typically occurring in response to pulses from 10 min to 1 h. However,  
138 shorter pulses (5, 10, 30 s) produce the same outcomes as the longer 12-h pulse.

139 Fresh weight, chlorophyll accumulation and anthocyanin accumulation were all measured  
140 under these conditions. All of these measurements showed trends in response to light that were  
141 highly similar to those observed for hypocotyl length (K. Folta, P. Kusuma; Unpub. obs.). These  
142 observations indicated that hypocotyl elongation was a suitable proxy for measuring

143 photomorphogenic progression. Further experiments would focus strictly on hypocotyl growth  
144 inhibition under various light treatments.

145

#### 146 **Persistence of Light Response**

147 The data from Figure 1 show that seedlings receiving the same DLI spread over 12 h or 5s  
148 intervals are comparable in terms of development and physical attributes. It was therefore of  
149 interest to examine the persistence of the light effect after the light pulse ended, and determine  
150 how long the dark period may be extended before the photomorphogenic development slowed. At  
151 the same time, growth under different wavebands may inform how different photosensory systems  
152 are contributing to photomorphogenic development along with their kinetics of dark reversion. To  
153 test these attributes, kale and turnip seedlings were grown under 5 s pulses of R, B or FR light (~140  
154  $\mu\text{mol m}^{-2} \text{s}^{-1}$  PAR; B= 30  $\mu\text{mol m}^{-2} \text{s}^{-1}$ , R= 110  $\mu\text{mol m}^{-2} \text{s}^{-1}$ , FR= 30  $\mu\text{mol m}^{-2} \text{s}^{-1}$ ) and the dark period  
155 was extended. The results of at least three independent experimental replicates are presented in  
156 Figure 2.

157 B and R light effects on hypocotyl growth inhibition begin to revert 10 s after a 5 s pulse in  
158 both kale and turnip. The effect of FR illumination was more persistent, as growth inhibition did not  
159 revert significantly until after 20 s of darkness in kale, and small (yet statistically significant)  
160 differences were seen in turnip seedlings after a 10 s dark period. A combination of light inputs (B=  
161 30  $\mu\text{mol m}^{-2} \text{s}^{-1}$ , R= 110  $\mu\text{mol m}^{-2} \text{s}^{-1}$ , FR= 30  $\mu\text{mol m}^{-2} \text{s}^{-1}$ ) provided stronger inhibition that persisted  
162 until after 10 s, but was still comparable to single-waveband 5 s dark treatments after 20 s of  
163 darkness. Trends of anthocyanin and chlorophyll accumulation were similar, indicating that the  
164 plants were not significantly compromised by the treatment, but were accumulating fewer pigments  
165 in response to light.

166

#### 167 **Experiments in Arabidopsis**



168 Seedlings from the model plant *Arabidopsis thaliana* were examined for their response to  
169 the same pulse conditions in Figure 3. Repeating the experiments in *Arabidopsis* allows examination  
170 of the response in a well-characterized physiological system and opens the possibility to examine  
171 mutant genotypes that may aid in understanding the genetics of persistent light signaling when  
172 plants are treated with extended dark periods.

173 The results in Figure 3 show the *Arabidopsis* (Col-0) response to pulse light with increasing  
174 dark periods after different fluence rates of B, R, and FR light. Seedlings treated with 5 s pulses at 1  
175  $\mu\text{mol m}^{-2} \text{s}^{-1}$  B light exhibit strong growth inhibition, but the response reverts quickly, as seedlings  
176 show loss of inhibition after 10 s of darkness, and a relatively linear loss with increasing dark  
177 intervals. Seedlings treated with 10  $\mu\text{mol m}^{-2} \text{s}^{-1}$  retain most of their inhibition even after 40 s of  
178 darkness. Illumination with 5 s of B light at 100  $\mu\text{mol m}^{-2} \text{s}^{-1}$  leads to strong growth inhibition that is  
179 almost completely retained to 160 s.

180 To the contrary, R light pulses had a much lower effect on growth inhibition in amplitude,  
181 yet the effects were persistent even at low fluence rates. The effects of FR light pulses were much  
182 like those of B light, with a strong effect on growth inhibition that was maintained after 20 s of  
183 darkness, even at low fluence rates. At 100  $\mu\text{mol m}^{-2} \text{s}^{-1}$  the inhibition was persistent, unchanged  
184 after 40 s of darkness, and maintaining the majority of growth inhibition even up to 160 s of dark  
185 period.

## 186 Genetic Analysis

187 The experiments outlined in Figure 3 indicate that different photosensory systems vary in  
188 maintaining the response to the pulse treatment. The mechanism can be better explored using  
189 photomorphogenic mutants in *Arabidopsis*. The experiments in Figure 3 were repeated using co-  
190 irradiation with R, B and FR light, tested on the *phyA*, *phyB*, *cry1*, and *cry2* mutants and their  
191 corresponding wild-type genotypes. Three wavebands were delivered simultaneously (as described  
192 above) to observe the effects of coaction. The results are shown in Figure 4.

193           The first observation is that both Col-0 and Ler genotypes respond strongly to all three  
194 wavebands in combination, reaching what appears to be full inhibition and retaining hypocotyl  
195 growth inhibition at least until 40 s of darkness. Examination of photomorphogenic mutants shows  
196 that *cry2* and *phyA* receptors are not required for retention of maximal growth inhibition, and that  
197 the absence of *cry1* or *phyB* leads to lower levels of inhibition in the 5-40 s dark interval treatment.  
198 However, the loss of either receptor does not lead to complete loss of response under illumination  
199 with multiple bandwidths. Examination of the double *cry1cry2* and *phyAphyB* mutants shows that  
200 the effects of double mutants are approximately the same as loss of either the *cry1* or *phyB* receptor  
201 alone. At longer dark intervals (80 or 160 s) *phyA* mutants still show inhibition that is not observed  
202 in *phyB* or *phyAB* mutants.

203

204

205 **Discussion**

206           The realistic potential of closed controlled environment (CCE) agriculture is limited by  
207 several factors, which include high costs of energy for illumination and temperature management  
208 [17]. The adoption of these technologies is tightly tied to grower profit, and that is substantially  
209 dependent on minimizing electricity costs. One of the other frequent justifications of the technology  
210 is that there is a potential to eliminate the carbon footprint of shipping to major urban centers, yet  
211 that is a claim that has yet to be realized, as CCE operations require substantial energy input [3, 5,  
212 18].

213           Several strategies have been proposed to decrease the energy demands of CCE. Plant  
214 breeding efforts are developing new varieties that perform better in low-light environments [19].  
215 Robotic mobile lighting systems produce intervals of illumination close to the plants, and produce  
216 the same amount of butterhead lettuce while cutting energy requirements in half [20]. Other  
217 groups have cut energy costs using lensing on LED light fixtures to focus radiant energy on leaves  
218 rather than between plants [17]. The work outlined in this report explores the use of pulsed  
219 illumination, from seconds to hours, to shape informative seedling traits. The dark period was then  
220 extended to examine how a light signals persist in darkness, lowering DLI and energy input.

221           The experiments follow observations from Garner and Allard [14] where they examined the  
222 effects of abnormal photoperiod on plant performance. In their report plants were grown under  
223 high intensity white light, with light/dark intervals ranging from 6 h down to seconds. The authors  
224 observed that plants treated with intervals from 1 h to 1 min performed poorly and exhibited  
225 symptoms of malnutrition, such as less chlorophyll and less accumulation of dry matter. However,  
226 plants grown under 5 s intervals performed the same as normal 12 h photoperiod controls [14]. In  
227 all of their conditions the pulses induced flowering in long-day plants and inhibited flowering in short  
228 day plants, indicating that the treatments were sufficient to satisfy a daylength requirement.

229 In the present study the principles of this seminal work were applied to developing  
230 seedlings. The work used seedlings because the developing seedling is exquisitely sensitive to light  
231 signals. Light sensing, integration and response results in conspicuous morphological, molecular and  
232 biochemical changes that may be easily monitored and measured. Traits such as inhibition of  
233 hypocotyl elongation, light mediated gene expression and the accumulation of photosynthetic or  
234 screening pigments are closely tied to light input, and respond proportionately over a large range of  
235 fluence rates and wavelengths. The experiments may be performed over the course of 96 h, allowing  
236 examination of a large number of seedlings in a short time. Principles identified in seedlings may  
237 later be tested in mature crop plants.

238 The species tested offer specific strengths and limitations. Red Russian Kale and Purple Top  
239 Turnip have been previously characterized and possess several conspicuous seedling responses to  
240 light across the spectrum, with a long range of linear response to varying fluence rates (P. Kusuma,  
241 K. Folta, unpub. obs.). While performing well in these experiments, the selection of two highly-  
242 plastic brassicas frames a central limitation to interpreting the results of the trials, as it is unclear  
243 how such treatments translate to distant taxa. The findings did translate well to two *Arabidopsis*  
244 *thaliana* ecotypes. While still brassicas, they are not crop plants, so it suggests that the ability to  
245 integrate an intermittent light signal is not something that arose from selection and is likely inherent  
246 to seedlings, at least within brassicas. Future experiments will test these responses in other  
247 important seedling varieties used as commercial food crops as well as in mature plants.

248 The basic experiments show that seedlings grown under 5 s on/off pulse are roughly  
249 comparable developmentally to seedlings grown under 12 h on/off pulses (Figure 1). The DLI is  
250 exactly the same at a given fluence rate ( $4.32 \text{ mol m}^{-2}$ ). Intervals that are 30 min or 1 h min long  
251 show less photomorphogenic advancement, despite treatment with the same DLI. As treatment  
252 durations increase to 3 and 6 h, plants show more photomorphogenic progression, before reaching  
253 their expected phenotype at 12 h on/off. Under all conditions the differences in photomorphogenic

254 development reflect effects of the timing of light/dark cycles. These findings begin to touch on the  
255 mechanism for how pulsed treatments work, as these results indicate that seedlings must have a  
256 means to gate light input into developmental processes that limits signals when they are delivered in  
257 pulses that are 30 min to 1 h in duration.

258 A good candidate might be components that input into the circadian oscillator. For instance,  
259 the Evening Complex [21] is a multi-protein complex formed from interaction of EARLY FLOWERING3  
260 [22] EARLYFLOWERING4 and LUXARRYTHMO [23]. It is expressed rhythmically and interacts with  
261 phyB. Ultimately the complex connects the internal oscillator to processes such as expression of  
262 genes associated with photosynthesis and plant growth. Developing seedlings with defects in the  
263 Evening Complex exhibit longer hypocotyls [23, 24]. The hypothesis is also consistent with the  
264 concept of “gating”, a process where a response cannot be activated because a molecular-  
265 biochemical constraint restricts the magnitude of circadian-oscillator conditioned responses [25].

266 It is tempting to speculate that short pulses are insufficient to condition the oscillator  
267 (override the gate), so from a photosensory viewpoint seedlings interpret short (seconds) pulses as  
268 constant light. However, when pulses reach 30 min to several hours in duration it is sufficient to set  
269 the biochemical complexities of the internal oscillator in motion, only to be disturbed by an  
270 unexpected period of darkness. The chloroplast also may be disturbed, as photosynthetic rates and  
271 partitioning of resources now occurs in intervals that are not in concert with the internal oscillator.

272 Because the 5 s on/off treatments are inconsequential to seedling growth, it was of interest  
273 to extend the dark period to determine how long the light could be removed without affecting  
274 seedling traits. The extended dark period could cut DLI, yet potentially yield the same seedling  
275 outcome. Seedlings were then grown under light-dark intervals where the dark period was extended  
276 to 10, 20, 40, 80 and 160 s. The results of the treatment illustrate the decay of the  
277 photomorphogenic response with time in Red Russian Kale and Purple Top Turnip (Figure 2). Far-red  
278 light exerts effects that are interval dependent and demonstrates the persistent activation of far-red

279 light signaling after treatment. Far-red light has been shown to exert powerful effects on inhibition  
280 of stem elongation [26, 27] and also promotes anthocyanin accumulation [28-30], and therefore is a  
281 way to uncouple developmental cues from photosynthetic influence. The effects of pulses on these  
282 processes confirms that at least part of the effect being observed is due to excitation of  
283 photomorphogenic systems, namely phyA. The cry1 receptor has been shown to be active for at  
284 least six minutes [31]. The persistence of a response to a 5 s pulse after 80 s darkness demonstrates  
285 that all relevant photoreceptors are saturated and excess energy is not able to contribute to the  
286 response. In photobiological terms reciprocity failure observed, as there is a non-linear response  
287 between photons applied and response measured. The likely cause is the molecular or physiological  
288 bottleneck that occurs when the seedling cannot sense, signal, or respond any further to an  
289 increasing level of input. This is an important threshold to understand, as energy applied once the  
290 plants have achieved a full response is essentially wasted.

291           This information is important in the design of artificial lighting environments. At least in  
292 seedlings under B, R and FR treatment, the coaction of multiple sensory systems leads to a more  
293 complete suppression of hypocotyl elongation than any single treatment alone. Figure 2 shows that  
294 the combination of B, R and FR leads to inhibition that is stronger than any single waveband,  
295 although the influence of the signal wanes after 10 s of darkness, and seedlings were substantially  
296 longer with 20 s of darkness following the light treatment. Supplemental Figure 1 shows the effects  
297 on pigments, as anthocyanin and chlorophyll levels slowly diminish with the extended dark period, yet  
298 not to the degree that hypocotyl elongation rate is affected. It also is important to note that both  
299 Red Russian Kale and Purple Top Turnip were likely selected because of their purple color, so  
300 anthocyanin levels may be expected to be high. There may be much less in other seedling varieties,  
301 but the results show that many traits may still be maintained through significant periods of darkness.  
302 Such findings could have a profound effect on energy savings if implemented in production contexts.

303           The same responses were tested in the model plant *Arabidopsis thaliana*. These tests were  
304 appropriate because of the substantial photophysiological and genetic understanding of inhibition of  
305 stem elongation in the species. The results of narrow-bandwidth light treatments indicate that a  
306 relatively low fluence rate treatment of  $10 \mu\text{mol m}^{-2} \text{s}^{-1}$  B or FR light can strongly inhibit stem  
307 elongation, and that the response persists even after 40 and 80 s respectively. Treatment with  $100$   
308  $\mu\text{mol m}^{-2} \text{s}^{-1}$  leads to potent suppression that persists even after 160 s for both wavelengths. The  
309 data indicate that the treatments approximate a dose-response relationship over a limited number  
310 of points tested. More importantly, a 5 s pulse of FR light at  $1 \mu\text{mol m}^{-2} \text{s}^{-1}$ , applied every 15 s is  
311 sufficient to suppress stem elongation almost maximally. These findings introduce the basis of  
312 examining the photon economy of plant development, as a relatively low fluence rate treatment  
313 more frequently may be more effective than a less-frequent high-fluence-rate pulse.

314           The results also show that R light sensing systems are less responsive than FR or B. Strong  
315 effects of R light on hypocotyl elongation rate are only seen with frequent pulses of high fluence rate  
316 light. At least with respect to *Arabidopsis* seedlings, and the limited data from kale and turnips,  
317 these results suggest that R light may be dispensable in maximizing early developmental response to  
318 light. B and FR light are more potent per photon delivered, which is an important consideration in  
319 the design of lighting regimes for plant growth. Light sources for these wavebands have  
320 approximately the same output in terms of photons per joule (Pattison et al., 2018), with substantial  
321 differences in how that energy investment translates to plant development. An energy honing  
322 strategy may be to provide a  $1 \mu\text{mol m}^{-2} \text{s}^{-1}$  pulse of FR light every 10 s, and a  $10 \mu\text{mol m}^{-2} \text{s}^{-1}$  of B  
323 light every 40 s. Robust suppression of stem elongation rate is achieved with fewer photons invested  
324 that is similar to a single daily high-fluence-rate 12 h treatment.

325           The results are consistent with what is observed in genetic analyses, which were performed  
326 on seedlings grown under blue, red and far-red light in combination. The results in Figure 4 show  
327 that elimination of cry1 leads to reversion of the sustained inhibition, and that cry2 has little

328 influence. With respect to phytochromes, phyA appear to be acting redundantly, and even the  
329 *phyAphyB* mutant shows inhibition after 10 s of darkness, likely an effect imparted by *cry1*. It is also  
330 worth noting that elimination of phyA leads to stronger growth inhibition after 80 s of darkness,  
331 suggesting a role in growth promotion that is opposing the effect of phyB, and other receptors.

332         The next steps will attempt to translate these results in seedlings to mature plants. Tests  
333 will examine if pulsed-light treatments can drive production of microgreens or even leafy greens  
334 with results comparable to normal-photoperiod plants. Even if the principles shown here fail to  
335 translate to mature crops the use of light interval treatments clearly is effective in seedlings, and the  
336 capacity to conserve energy during establishment is still an important gain even if the plants require  
337 normal photoperiodic treatments going forward. It also may be possible to select specific varieties  
338 that perform well under these light-dark treatments with extended dark periods. In all cases these  
339 seconds-long pulses may be one other way to limit the cost of production in closed, controlled  
340 environments.



341 **Acknowledgements**

342 The authors thank the Chinese Scholarship Council for supporting the visiting scientist appointment  
343 of SS. SC's postdoctoral appointment was funded by the United States Department of Agriculture  
344 Grant number . We thank by Light Emitting Computers (Victoria, BC Canada) for providing summer  
345 salary for PK. We present this work in memory of LEC founder Jeffery Bucove who shared a vision of  
346 using artificial lighting strategies to improve plant production to aid the human condition.

347

348 **Figure Legends**

349 Figure 1. Light pulse frequency effects in select seedlings. Inhibition of hypocotyl elongation and  
350 anthocyanin accumulation were assessed in seedlings of Red Russian Kale, Purple Top Turnip, and  
351 Ruby Queen Beet in response to  $10 \mu\text{mol m}^{-2} \text{s}^{-1}$  far red light, applied for various time intervals for  
352 96 h. The mean represents measurements from one experiment with at least 30 seedlings.  
353 Independent experiments were performed with similar results. Error bars represent standard error  
354 of the mean.

355 Figure 2. The effect of extending the dark period following a light pulse in Red Russian Kale and  
356 Purple Top Turnip. Inhibition of hypocotyl elongation was assessed in response to  $100 \mu\text{mol m}^{-2} \text{s}^{-1}$   
357 blue, red, far-red, or combination (B:R:FR= 1:4:1;  $\sim 140 \mu\text{mol m}^{-2} \text{s}^{-1}$ ) light, followed by a dark period  
358 ranging from 5 to 160 s for 96 h. For each experiment  $N > 20$  seedlings and the mean reflects the  
359 results of three independent experiments. Error bars represent the standard error of the mean.  
360 Different letters represent significant differences by LSD ANOVA analysis ( $p < 0.05$ ).

361 Figure 3. Wavelength dependence and fluence-rate/response effect on hypocotyl inhibition.  
362 *Arabidopsis thaliana* seedlings were germinated and grown under various pulse conditions under  
363 various fluence rates of blue, red or far-red light. Light pulses were applied for 5 s and the dark  
364 interval varied. Hypocotyl lengths were assessed after 96 h. The means represent outcomes from  
365 three independent experiments ( $N > 20$  each). Error bars represent the standard error of the mean.  
366 Different letters represent significant differences by LSD ANOVA analysis ( $p < 0.05$ ).

367 Figure 4. The effect of light pulse persistence in Arabidopsis mutants and corresponding wild-type  
368 plants. Arabidopsis seedlings were grown under a combination of blue, red, and far-red light (1:4:1)  
369 and a fluence rate of  $\sim 140 \mu\text{mol m}^{-2} \text{s}^{-1}$ , pulsed for five seconds with a variable dark period. The data  
370 represent averages of three independent experiments ( $N > 20$ ). Error bars indicate standard error of  
371 the mean, and letter designations represent significant differences by LSD ANOVA analysis ( $p < 0.05$ ).

372

373

374

375

376

377

378

379 **Supplemental Figure**

380 Supplemental Figure 1. The effect of extending the dark period on pigment accumulation in Red  
381 Russian Kale and Purple Top Turnip. Anthocyanin and chlorophyll accumulation levels were analyzed  
382 in response to 100  $\mu\text{mol m}^{-2} \text{s}^{-1}$  blue, red, far-red, or combination (B:R:FR= 1:4:1;  $\sim 140 \mu\text{mol m}^{-2} \text{s}^{-1}$ )  
383 light, followed by a dark period ranging from 5 to 160 s for 96 h. For each experiment N>6 seedlings  
384 and the mean reflects the results of three independent experiments. Error bars represent the  
385 standard error of the mean. Different letters represent significant differences by one-way ANOVA  
386 with Tukey HSD post-hoc test ( $p < 0.05$ ).

## **Literature Cited**

- [1] M. Al-Chalabi, Vertical farming: Skyscraper sustainability?, *Sustainable Cities and Society*, 18 (2015) 74-77.
- [2] D. Despommier, The vertical farm: controlled environment agriculture carried out in tall buildings would create greater food safety and security for large urban populations, *Journal für Verbraucherschutz und Lebensmittelsicherheit*, 6 (2011) 233-236.
- [3] T. Kozai, Sustainable plant factory: Closed plant production systems with artificial light for high resource use efficiencies and quality produce, in, pp. 27-40.
- [4] C. Zeidler, D. Schubert, V. Vrakking, Feasibility study: vertical farm EDEN, (2013).
- [5] K. Harbick, L.D. Albright, Comparison of energy consumption: greenhouses and plant factories, in, pp. 285-292.
- [6] T. Kozai, G. Niu, M. Takagaki, *Plant factory: an indoor vertical farming system for efficient quality food production*, Academic Press, 2015.
- [7] C. Kami, S. Lorrain, P. Hornitschek, C. Fankhauser, Light-regulated plant growth and development, *Curr Top Dev Biol*, 91 (2010) 29-66.
- [8] M. de Wit, V.C. Galvao, C. Fankhauser, Light-Mediated Hormonal Regulation of Plant Growth and Development, *Annu Rev Plant Biol*, 67 (2016) 513-537.
- [9] J.A. Sullivan, X.W. Deng, From seed to seed: the role of photoreceptors in Arabidopsis development, *Dev Biol*, 260 (2003) 289-297.
- [10] P. Lymeropoulos, J. Msanne, R. Rabara, Phytochrome and Phytohormones: Working in Tandem for Plant Growth and Development, *Front Plant Sci*, 9 (2018) 1037.
- [11] P.M. Pattison, J.Y. Tsao, G.C. Brainard, B. Bugbee, LEDs for photons, physiology and food, *Nature*, 563 (2018) 493-500.
- [12] J.C. Sager, W. Giger, Re-evaluation of published data on the relative photosynthetic efficiency of intermittent and continuous light, *Agricultural Meteorology*, 22 (1980) 289-302.
- [13] D.J. Tennessen, R.J. Bula, T.D. Sharkey, Efficiency of photosynthesis in continuous and pulsed light emitting diode irradiation, *Photosynthesis Research*, 44 (1995) 261-269.
- [14] W.W. Garner, H.A. Allard, Effect of abnormally long and short alternations of light and darkness on growth and development of plants, United States Department of Agriculture, 1931.
- [15] M.M. Neff, J. Chory, Genetic interactions between phytochrome A, phytochrome B, and cryptochrome 1 during Arabidopsis development, *Plant Physiol*, 118 (1998) 27-35.
- [16] S.D. Carvalho, K.M. Folta, Sequential light programs shape kale (*Brassica napus*) sprout appearance and alter metabolic and nutrient content, *Horticulture Research*, 1 (2014) 1-13.

- [17] K. Li, Z. Li, Q. Yang, Improving Light Distribution by Zoom Lens for Electricity Savings in a Plant Factory with Light-Emitting Diodes, *Frontiers in Plant Science*, 7 (2016) 92.
- [18] T. Kozai, G. Niu, Role of the Plant Factory with Artificial Lighting in Urban Areas  
in: T. Kozai, G. Niu, T. Takagaki (Eds.) *Plant Factory: An Indoor Vertical Farming System for Efficient Quality Plant Production*, Academic Press, 2015, pp. 7-27.
- [19] K.M. Folta, Breeding new varieties for controlled environments, *Plant Biology*, 21 (2019) 6-12.
- [20] K. Li, Q.-C. Yang, Y.-X. Tong, R. Cheng, Using movable light-emitting diodes for electricity savings in a plant factory growing lettuce, *Horttechnology*, 24 (2014) 546-553.
- [21] D. Ezer, J.-H. Jung, H. Lan, S. Biswas, L. Gregoire, M.S. Box, V. Charoensawan, S. Cortijo, X. Lai, D. Stöckle, C. Zubieta, K.E. Jaeger, P.A. Wigge, The evening complex coordinates environmental and endogenous signals in *Arabidopsis*, *Nature Plants*, 3 (2017) 17087.
- [22] K.A. Hicks, T.M. Albertson, D.R. Wagner, EARLY FLOWERING3 Encodes a Novel Protein That Regulates Circadian Clock Function and Flowering in *Arabidopsis*, in: *Plant Cell*, 2001, pp. 1281-1292.
- [23] D.A. Nusinow, A. Helfer, E.E. Hamilton, J.J. King, T. Imaizumi, T.F. Schultz, E.M. Farre, S.A. Kay, The ELF4-ELF3-LUX complex links the circadian clock to diurnal control of hypocotyl growth, *Nature*, 475 (2011) 398-402.
- [24] S.X. Lu, C.J. Webb, S.M. Knowles, S.H.J. Kim, Z. Wang, E.M. Tobin, CCA1 and ELF3 Interact in the control of hypocotyl length and flowering time in *Arabidopsis*, *Plant physiology*, 158 (2012) 1079-1088.
- [25] A. de Montaigu, M.C. Berns, G. Coupland, A Luciferase-Based Assay to Test Whether Gene Expression Responses to Environmental Inputs Are Temporally Restricted by the Circadian Clock, in: P. Duque (Ed.) *Environmental Responses in Plants: Methods and Protocols*, Springer New York, New York, NY, 2016, pp. 93-106.
- [26] M.T. Boylan, P.H. Quail, Phytochrome a overexpression inhibits hypocotyl elongation in transgenic *Arabidopsis*, *Proc Natl Acad Sci U S A*, 88 (1991) 10806-10810.
- [27] F.D. Beall, E.C. Yeung, R.P. Pharis, Far-red light stimulates internode elongation, cell division, cell elongation, and gibberellin levels in bean, *Canadian Journal of Botany*, 74 (1996) 743-752.
- [28] H. Lange, W. Shropshire, H. Mohr, An Analysis of Phytochrome-mediated Anthocyanin Synthesis, *Plant Physiology*, 47 (1971) 649.
- [29] B. Steinitz, E. Schäfer, H. Drumm, H. Mohr, Correlation between far-red absorbing phytochrome and response in phytochrome-mediated anthocyanin synthesis, *Plant, Cell & Environment*, 2 (1979) 159-163.
- [30] H. Drumm, H. Mohr, The dose response curve in phytochrome-mediated anthocyanin synthesis in the mustard seedling, *Photochemistry and Photobiology*, 20 (1974) 151-157.
- [31] V. Herbel, C. Orth, R. Wenzel, M. Ahmad, R. Bittl, A. Batschauer, Lifetimes of *Arabidopsis* cryptochrome signaling states in vivo, *The Plant Journal*, 74 (2013) 583-592.

**Figure 1**

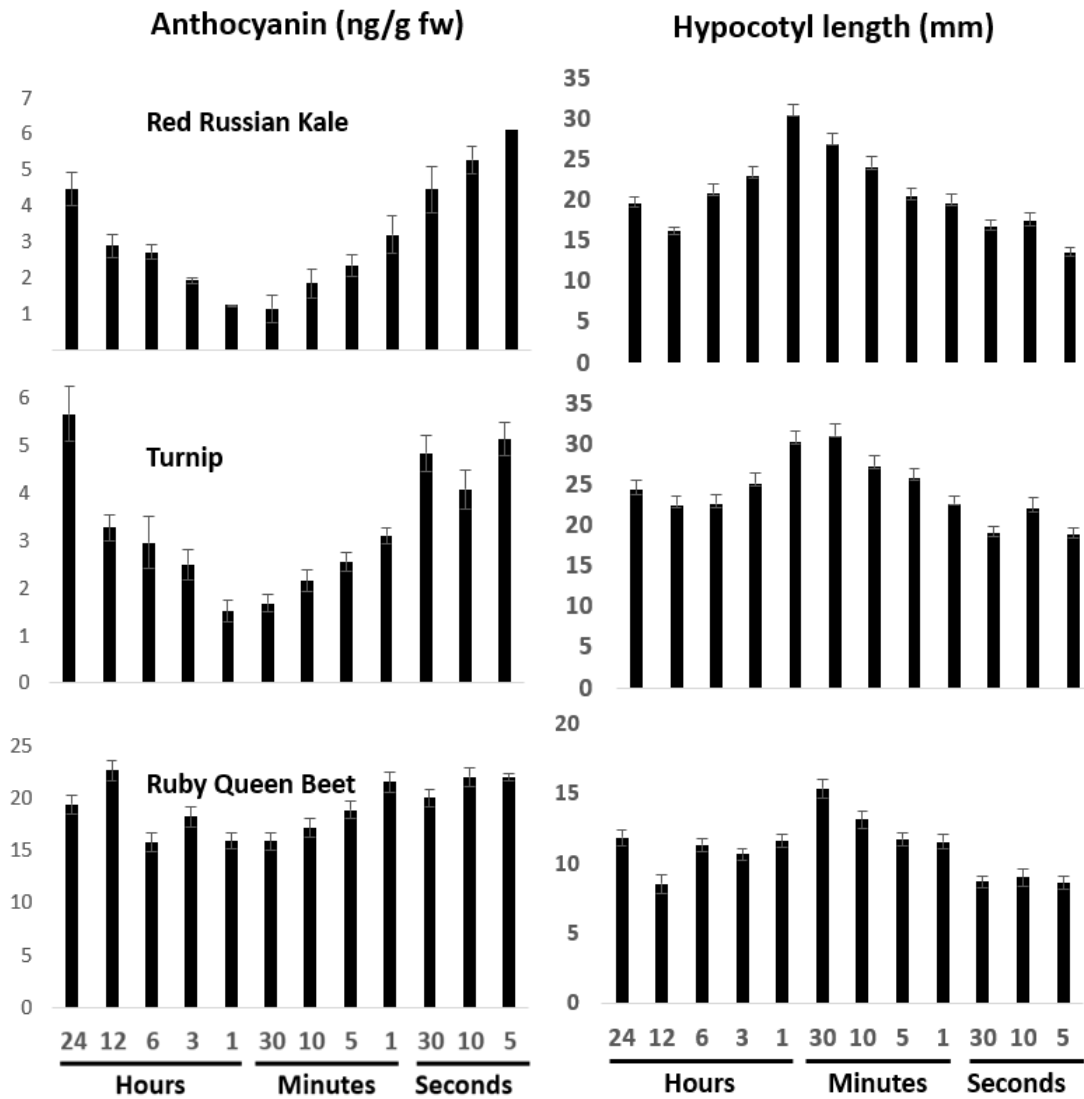

**Figure 2**

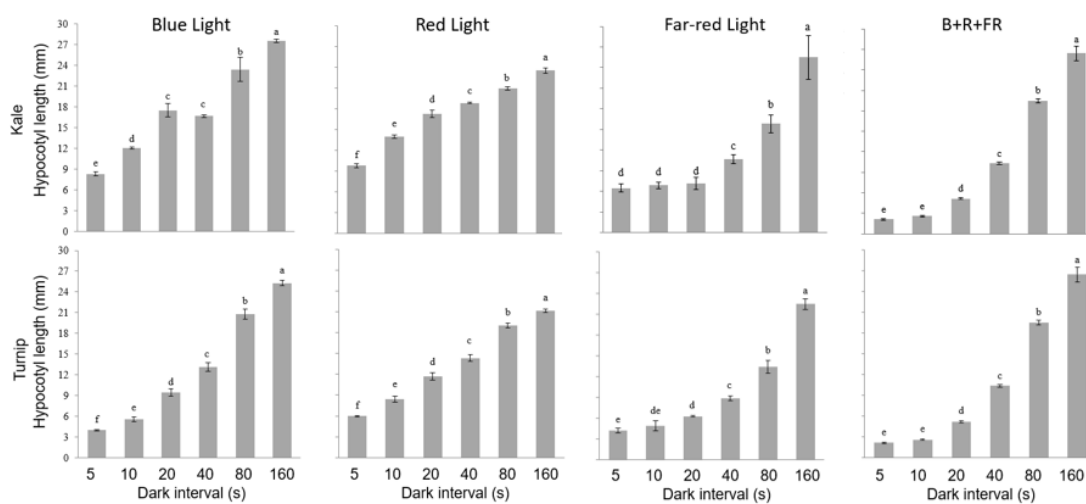

**Figure 3**

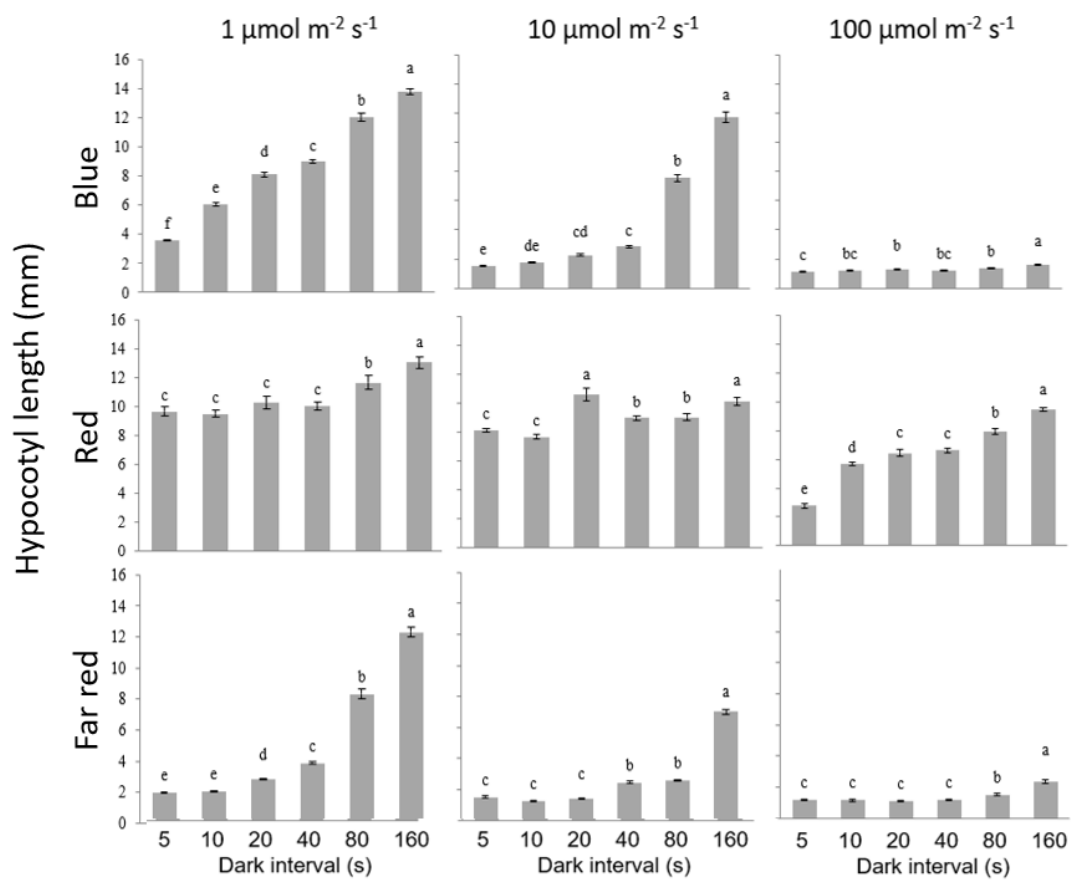



**Figure 4**

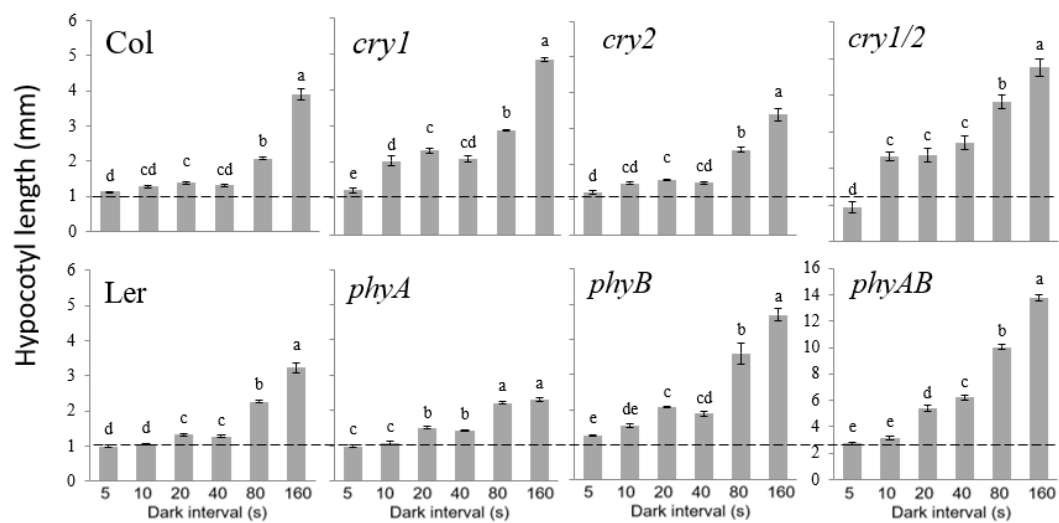

Supplemental Figure 1.

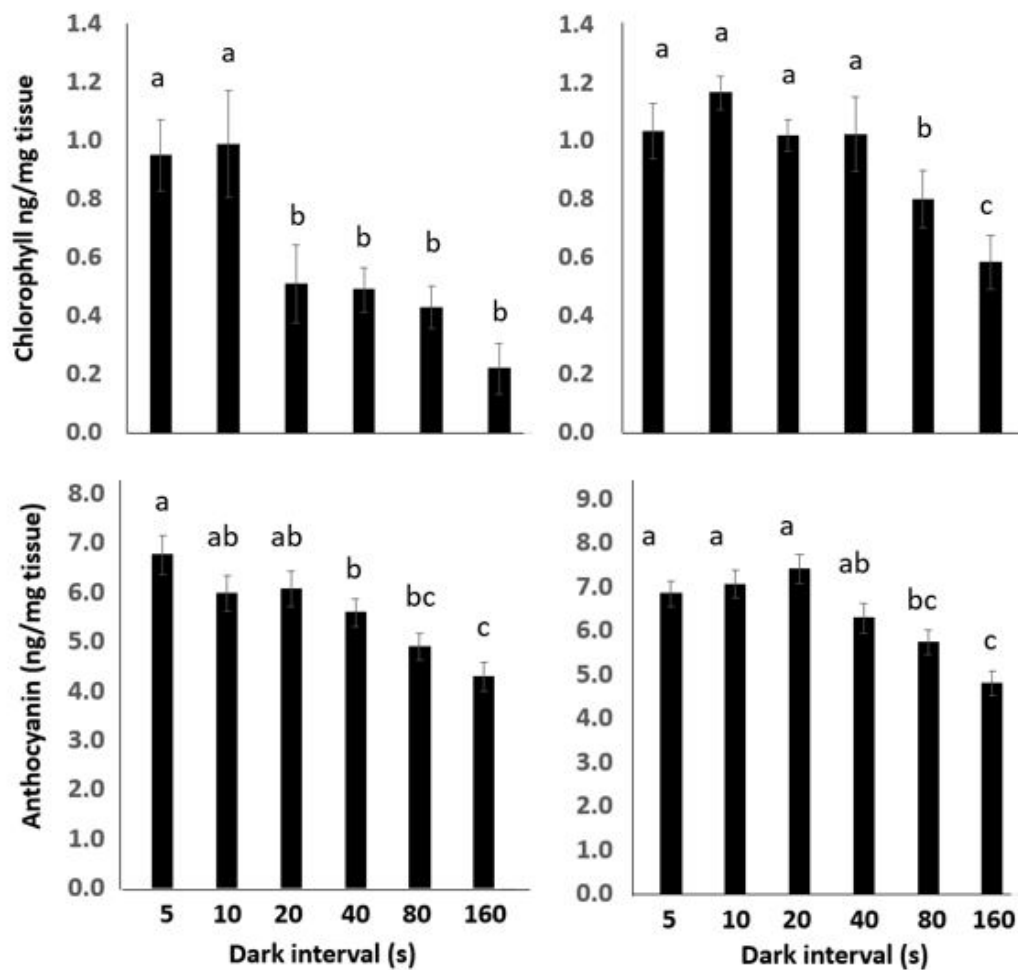

Source: https://www.biorxiv.org/content/10.1101/674432v1.full.pdf
